# Supplementary material for: Exploratory study of weed density, distribution and soil seed bank composition in a selected abaca (Musa textilis) plantation at Baybay City, Philippines
Source: Research Square preprint supplement (doi:10.21203/rs.3.rs-7422003/v1), 2025-12-15
Supplement: Supplementary file 1 [file 45bdb052bd3e198180714c2e.xlsx]

## Sheet: Weed Count ABV & SSB
Attributes	Morphology	Total Individuals	Density	RelativeDensity(%)	Frequency(%)
Above-ground vegetation	Broadleaf	566	62.89	70.05	100
Above-ground vegetation	Grass	209	23.22	25.86	77.78
Above-ground vegetation	Sedge	33	3.67	4.09	33.33
Soil Seed Bank	Broadleaf	31		83.8
Soil Seed Bank	Grass	3		8.1
Soil Seed Bank	Sedge	3		8.1

## Sheet: Distribution
Row Labels	Sum of Density	Sum of RelativeDensity(%)	Sum of Frequency(%)
Broadleaf	62.89	70.05	100
Grass	23.22	25.86	77.78
Sedge	3.67	4.09	33.33

## Sheet: Density etc
Morphology	Total Individuals	Density	RelativeDensity(%)	Frequency(%)
Broadleaf	566	62.89	70.05	100
Grass	209	23.22	25.86	77.78
Sedge	33	3.67	4.09	33.33
Broadleaf	31		83.8
Grass	3		8.1
Sedge	3		8.1

## Sheet: Comparison
Sum of RelativeDensity(%)	Column Labels
Row Labels	Above-ground vegetation	Soil Seed Bank
Broadleaf	70.05	83.8
Grass	25.86	8.1
Sedge	4.09	8.1

## Sheet: Relative Density ABV & SSB
Attributes	Morphology	RelativeDensity(%)
Above-ground vegetation	Broadleaf	70.05
Above-ground vegetation	Grass	25.86
Above-ground vegetation	Sedge	4.09
Soil Seed Bank	Broadleaf	83.8
Soil Seed Bank	Grass	8.1
Soil Seed Bank	Sedge	8.1

## Sheet: ABV Raw data
Site A
	Quadrat 1				number of species	Subtotal
		Chromolaena odorata			28
		Spermacoce leavis			4
		Mimosa pudica			6
		Frimbistylis miliacea			4
		Nephrolepsis exalta			16
		Paspalum notatum			10
						68
	Quadrats 2
		Chromolaena odorata			38
		Ludwigdia octovalivis			3
		Stachytarpheta jamaicensis			2
		Paspalum notatum			11
		Imperata cylindrica			21
						75
	Quadrat 3
		Chromolaena odorata			27
		Paspalum conjugatum			18
		Stachytarpheta jamaicensis			3
		Mimosa pudica			2
		Digitaria sanguinalis			3
		Frimbistylis miliacae			1
		Phyllantus niruri			8	62
					205
Site B
	Quadrat 1
		Chromolaena odorata			17
		Mimosa pudica			5
		Cyanthillium cinereum			8
		Paspalum notatum			16
						46
	Quadrat 2
		Chromolaena odorta			24
		Cyanthillium cinereum			11
		paspalum conjugatum			16
		Stachytarpheta jamaicensis			4
		cyperus kyllingia			12
		phyllantus niruri			9
						76
	Quadrat 3
		cyperus kyllingia			12
		paspalum notatum			8
		imperata cylindrica			21
		Nephrolepsis exalta			14
		Digitaria sanguinalis			16
						71
					193
Site C
	Quadrat 1
		Cyanthillium cinereum			8
		chromolaena odorata			54
		stellaria media			21
		Nephrolepsis exalta			20
						103
	Quadrat 2
		Chromolaena odorata			56
		stellaria media			32
		Nephrolepsis exalta			21
		cyperus kyllingia			8
		inperata cylindrica			31
						148
	Quadrat 3
		Paspalum conjugatum			21
		Chromolaena odorata			48
		Mimosa pudica			8
		Imperata cylindrica			24
		paspalum notatum			21
		sterllaria media			13
		phyllantus niruri			16
						151
					402

## Sheet: SSB Raw data 
					Weed Emergence of Soil Seed Bank Analysis
Depth (cm)	Weeks			Weed Species								No of Emerged seedlings			Morphological Characteristics
0-10	1			Synedrella								4			Broadleaf
				Biophytum								3			Broadleaf
10-20cm	1			Phyllnatus								2			Broadleaf
20-30	1			0								0
0-10	2			Ageratum								2			Broadlef
				Chromolaena								3			Broadlef
				Rotboellia								3			Grass
				Synedrella								2			Broadlef
10-20 cm	2			Acaphyla								1			Broadlef
20 - 30	2			0								0
0-10	3			Cyperus								3			Segde
10-20cm	3			phyllantus								2			Broadleaf
				Mimosa								2			Broadleaf
20-30	3			0								0
0-10	4			Ageratum								5			Broadleaf
				chromolaena								4			Broadleaf
10-20 cm	4			0								0
20-30	4			0								0
0-10	5			Mimosa								1			Broadleaf
10-20 cm	5			0								0
20-30	5			0								0
